# Supplementary material
Source: PubMed Central journal article supplement (PMC2906876)
Supplement: 0911854107_pnas.200911854SI.pdf [file 0911854107_pnas.200911854SI.pdf]

# Supporting Information

Gonzalez et al. 10.1073/pnas.0911854107

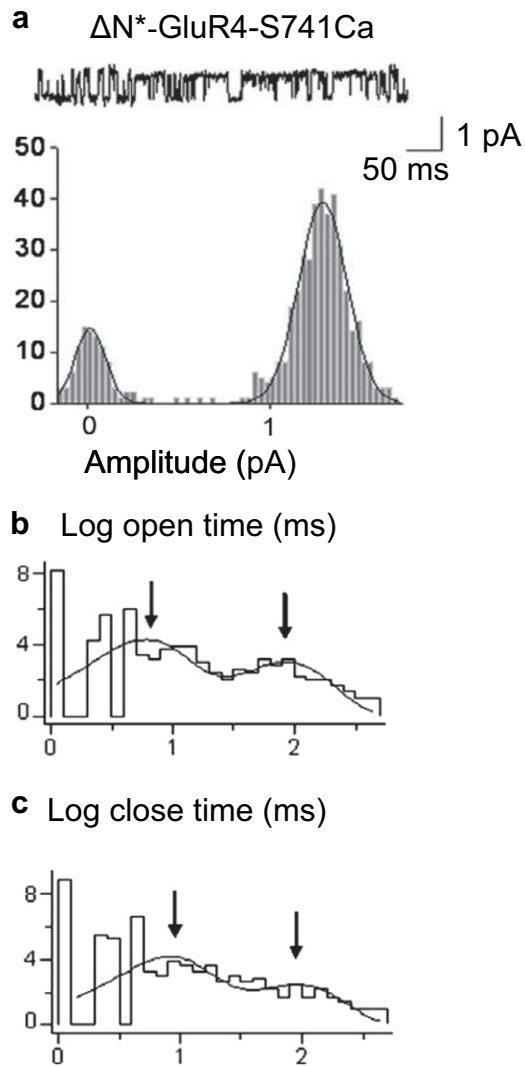

**Fig. S1.** Single-channel currents from bilayers of membrane preparations of modified glutamate receptors expressed in oocytes obtained using the same protocol as for the LRET investigations. (A) Amplitude histograms and representative single-channel traces are shown for terbium chelate and ATTO465-labeled  $\Delta N^*$ -GluR4-S741C receptors. Currents were recorded at 120 mV in the presence of 1 mM glutamate and 100  $\mu$ M cyclothiazide. The primary conductance state is 9–12 pS. (B) Open and (C) close time distributions are shown for  $\Delta N^*$ -GluR4-S741C; two distinct close times and two distinct open times were obtained.

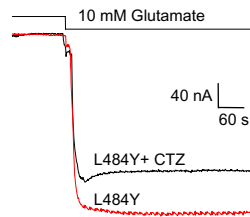

**Fig. S2.** Currents from GluR4-S742C-L484Y receptors expressed in oocytes. Currents were recorded in saturating concentrations of glutamate (10 mM) and in the presence and absence of cyclothiazide (CTZ) (100  $\mu$ M).

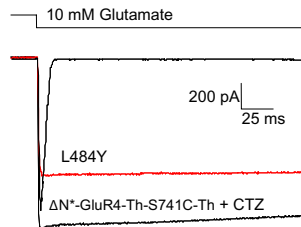

**Fig. S3.** Currents from  $\Delta$ N\*-GluR4-Th-S741C-Th receptors expressed in HEK-293 cells. Currents were recorded in the presence of saturating concentrations (10 mM) of glutamate, in the presence of 10 mM glutamate and 100  $\mu$ M cyclothiazide (CTZ), and for the L484Y mutation.

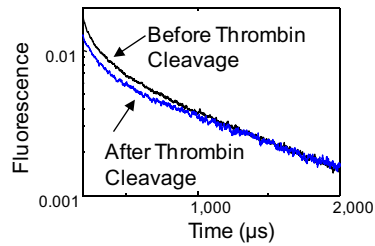

**Fig. S4.** The LRET lifetimes measured at 510 nm for donor:acceptor-tagged  $\Delta$ N\*-GluR4-Th-S741-Th before and after thrombin cleavage shown in the logarithmic y axis.

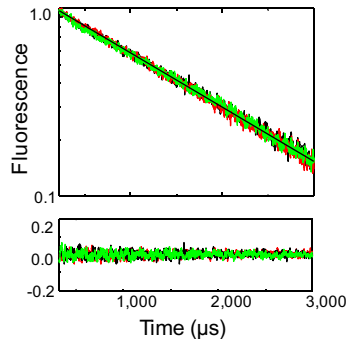

**Fig. S5.** LRET lifetimes shown in the logarithmic y axis for donor-only-tagged  $\Delta$ N\*-GluR4-S741 expressed in oocytes. Lifetimes were measured at 488 nm in the Apo (black), open (10 mM glutamate in the presence of 100  $\mu$ M cyclothiazide; red), and desensitized (10 mM glutamate; green) states. Residuals for the LRET lifetime fits are shown in linear y axis.



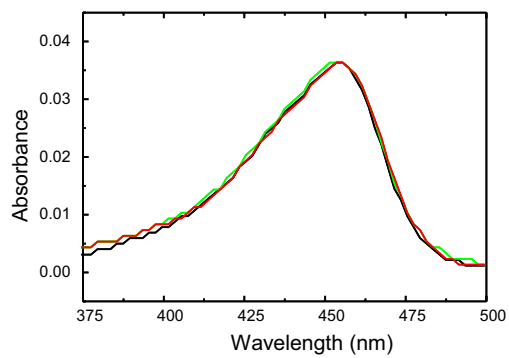

Fig. S9. Absorption spectrum of ATTO 465 (black) is not significantly affected by the addition of 10 mM glutamate (green) or 100  $\mu$ M cyclothiazide (red).
